# Supplementary material
Source: PubMed Central journal article supplement (PMC2417183)

**SUPPLEMENTAL FIGURE 1: GST-R Pull-Down of the Smt3-STAS Fusion Proteins.** (A) An anti-His<sub>6</sub> western blot is shown of the six soluble Smt3-STAS fusion proteins pulled down by GST (top panel) or by GST-R (CFTR residues 654-835, bottom panel). Lane 1) Smt3-STAS 503-764, lane 2) Smt3-STAS 503-741, lane 3) Smt3-STAS 510-764, lane 4) Smt3-STAS 510-741, lane 5) Smt3-STAS 525-764, lane 6) Smt3-STAS 525-741. The results indicate that only the Smt3-STAS 510-741 protein binds specifically to the R-domain under these conditions. (B) Smt3-STAS also binds specifically to phosphorylated GST-R however; the large enhancement of binding previously observed in cell lysates is not observed *in vitro* (33). This suggests that there maybe additional factors present in cells that confer the phosphorylation dependant binding of the STAS and R-domains previously seen (33), or that the effect of phosphorylation on binding is simply to increase the affinity of the interaction and this difference is not observable at higher protein concentrations used in our pull-down assay. The molecular weight markers shown to the left of the gels are measured in kDa.

# Supplemental Figure 1:

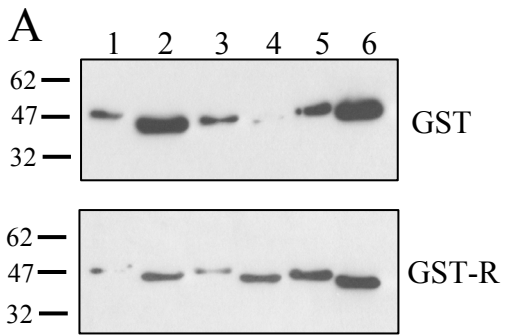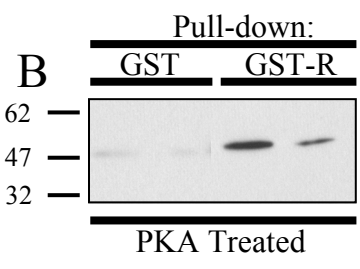

Supplement: jbc_M704328200_1.pdf [file jbc_M704328200_1.pdf]
